# Supplementary material for: The Roles of Three Types of Knowledge and Perceived Uncertainty in Explaining Risk Perception, Acceptability, and Self-Protective Response—A Case Study on Endocrine Disrupting Surfactants
Source: PubMed Central journal article supplement (PMC5858365; doi:10.3390/ijerph15020296), 2018-02-08
Supplement: ijerph-15-00296-s001.pdf [file ijerph-15-00296-s001.pdf]

## Supplementary material

**Table S1.** Construct reliability and validity (n = 331).

| Latent construct                                                               | CR  | AVE | MSV | ASV |
|--------------------------------------------------------------------------------|-----|-----|-----|-----|
| General awareness of water pollution and reproductive health problems (GA)     | 0.9 | 0.6 | 0.2 | 0.1 |
| Awareness of the pathways of exposure that may affect reproductive health (AP) | 0.9 | 0.8 | 0.2 | 0.1 |
| Specific awareness of endocrine disrupting surfactants (SA)                    | 0.8 | 0.5 | 0.4 | 0.1 |
| Risk belief (RB)                                                               | 0.8 | 0.7 | 0.4 | 0.2 |
| Risk concern (RC)                                                              | 0.8 | 0.7 | 0.2 | 0.1 |
| Perceived uncertainty (UN)                                                     | 0.9 | 0.8 | 0.2 | 0.1 |
| Risk acceptability (RAC)                                                       | 0.9 | 0.7 | 0.3 | 0.1 |
| Non-diet-related self-protective response (NDSP)                               | 0.8 | 0.6 | 0.2 | 0.1 |

**Table S2.** Construct discriminant validity (n = 331).

| Latent construct                                                               | Pearson correlations |         |          |          |          |          |         |       |
|--------------------------------------------------------------------------------|----------------------|---------|----------|----------|----------|----------|---------|-------|
|                                                                                | GA                   | AP      | SA       | RB       | RC       | UN       | RAC     | NDSP  |
| General awareness of water pollution and reproductive health problems (GA)     | 0.742                |         |          |          |          |          |         |       |
| Awareness of the pathways of exposure that may affect reproductive health (AP) | 0.331**              | 0.887   |          |          |          |          |         |       |
| Specific awareness of endocrine disrupting surfactants (SA)                    | -0.078               | 0.014   | 0.707    |          |          |          |         |       |
| Risk belief (RB)                                                               | 0.249**              | 0.225** | 0.529**  | 0.814    |          |          |         |       |
| Risk concern (RC)                                                              | 0.337**              | 0.057   | 0.184**  | 0.134*   | 0.850    |          |         |       |
| Perceived uncertainty (UN)                                                     | -0.009               | -0.084  | -0.400** | -0.317** | -0.403** | 0.878    |         |       |
| Risk acceptability (RAC)                                                       | 0.427**              | 0.029   | 0.084    | 0.478**  | 0.338**  | 0.066    | 0.857   |       |
| Non-diet-related self-protective response (NDSP)                               | 0.204**              | 0.191** | 0.357**  | 0.472**  | 0.137*   | -0.210** | 0.520** | 0.755 |

Notes: \* Correlation is significant at the 0.05 level (2-tailed); \*\* Correlation is significant at the 0.01 level (2-tailed). The square roots of the average variance extracted values were showed in shaded boxes.

**Table S3.** The multicollinearity statistics of the independent constructs (n = 328).

| Independent construct                                                          | Tolerance | VIF |
|--------------------------------------------------------------------------------|-----------|-----|
| General awareness of water pollution and reproductive health problems (GA)     | 0.68      | 1.5 |
| Awareness of the pathways of exposure that may affect reproductive health (AP) | 0.86      | 1.2 |
| Specific awareness of endocrine disrupting surfactants (SA)                    | 0.61      | 1.6 |
| Risk belief (RB)                                                               | 0.60      | 1.7 |
| Risk concern (RC)                                                              | 0.70      | 1.4 |
| Perceived uncertainty (UN)                                                     | 0.69      | 1.4 |

**Table S4.** The results of normality test for the constructs (n = 328).

| Construct                                                                      | Group         | Minimum | Maximum | Mean | Standard deviation | Skewness  |      |         | Kurtosis  |      |         |
|--------------------------------------------------------------------------------|---------------|---------|---------|------|--------------------|-----------|------|---------|-----------|------|---------|
|                                                                                |               |         |         |      |                    | Statistic | S.E. | z-value | Statistic | S.E. | z-value |
| General awareness of water pollution and reproductive health problems (GA)     | Inexperienced | 1.4     | 6.5     | 5.4  | 0.05               | -2.4      | 0.16 | -15.0   | 8.9       | 0.32 | 27.8    |
|                                                                                | Experienced   | 1.2     | 6.4     | 5.2  | 0.10               | -2.2      | 0.25 | -8.8    | 5.4       | 0.49 | 11.0    |
|                                                                                | N_Pr.Ym       | 1.2     | 6.5     | 5.4  | 0.06               | -2.4      | 0.17 | -14.1   | 7.4       | 0.33 | 22.4    |
|                                                                                | Pr.Ym         | 1.4     | 6.4     | 5.4  | 0.07               | -2.0      | 0.22 | -9.1    | 7.1       | 0.44 | 16.1    |
| Awareness of the pathways of exposure that may affect reproductive health (AP) | Inexperienced | 0.5     | 5.6     | 3.8  | 0.06               | -0.6      | 0.16 | -3.8    | 0.8       | 0.32 | 2.5     |
|                                                                                | Experienced   | 0.9     | 5.5     | 3.7  | 0.09               | -0.7      | 0.25 | -2.8    | 1.0       | 0.49 | 2.0     |
|                                                                                | N_Pr.Ym       | 0.5     | 5.6     | 3.7  | 0.06               | -0.6      | 0.17 | -3.5    | 0.9       | 0.33 | 2.7     |
|                                                                                | Pr.Ym         | 0.9     | 5.4     | 3.8  | 0.08               | -0.4      | 0.22 | -1.8    | 0.4       | 0.44 | 0.9     |
| Specific awareness of endocrine disrupting surfactants (SA)                    | Inexperienced | 0.1     | 3.5     | 1.8  | 0.06               | -0.2      | 0.16 | -1.3    | -1.1      | 0.32 | -3.4    |
|                                                                                | Experienced   | 0.1     | 3.5     | 1.7  | 0.09               | 0.3       | 0.25 | 1.2     | -0.9      | 0.49 | -1.8    |
|                                                                                | N_Pr.Ym       | 0.1     | 3.5     | 1.8  | 0.06               | -0.1      | 0.17 | -0.6    | -1.1      | 0.33 | -3.3    |
|                                                                                | Pr.Ym         | 0.3     | 3.5     | 1.8  | 0.08               | 0.1       | 0.22 | 0.5     | -1.2      | 0.44 | -2.7    |
| Risk belief (RB)                                                               | Inexperienced | 1.7     | 6.0     | 4.1  | 0.05               | 0.2       | 0.16 | 1.3     | -0.3      | 0.32 | -0.9    |
|                                                                                | Experienced   | 1.3     | 5.6     | 3.8  | 0.10               | -0.3      | 0.25 | -1.2    | -0.3      | 0.49 | -0.6    |
|                                                                                | N_Pr.Ym       | 1.3     | 6.0     | 4.1  | 0.06               | -0.1      | 0.17 | -0.6    | 0.3       | 0.33 | 0.9     |
|                                                                                | Pr.Ym         | 1.7     | 5.8     | 4.0  | 0.08               | -0.1      | 0.22 | -0.5    | -0.3      | 0.44 | -0.7    |
| Risk concern (RC)                                                              | Inexperienced | 0.7     | 4.9     | 4.0  | 0.06               | -1.4      | 0.16 | -8.8    | 1.8       | 0.32 | 5.6     |
|                                                                                | Experienced   | 0.8     | 4.9     | 4.0  | 0.09               | -1.4      | 0.25 | -5.6    | 1.8       | 0.49 | 3.7     |
|                                                                                | N_Pr.Ym       | 0.7     | 4.9     | 4.0  | 0.07               | -1.5      | 0.17 | -8.8    | 1.7       | 0.33 | 5.2     |
|                                                                                | Pr.Ym         | 2.0     | 4.9     | 4.1  | 0.07               | -0.9      | 0.22 | -4.1    | -0.4      | 0.44 | -0.9    |
| Perceived uncertainty (UN)                                                     | Inexperienced | 0.7     | 4.1     | 2.0  | 0.06               | 0.6       | 0.16 | 3.8     | -0.7      | 0.32 | -2.2    |
|                                                                                | Experienced   | 0.6     | 4.1     | 2.1  | 0.09               | 0.4       | 0.25 | 1.6     | -0.7      | 0.49 | -1.4    |
|                                                                                | N_Pr.Ym       | 0.7     | 4.1     | 2.1  | 0.07               | 0.4       | 0.17 | 2.4     | -1.0      | 0.33 | -3.0    |
|                                                                                | Pr.Ym         | 0.6     | 4.0     | 1.9  | 0.08               | 0.7       | 0.22 | 3.2     | -0.1      | 0.44 | -0.2    |
| Risk acceptability (RAC)                                                       | Inexperienced | 2.6     | 6.9     | 5.6  | 0.05               | -1.0      | 0.16 | -6.3    | 1.3       | 0.32 | 4.1     |
|                                                                                | Experienced   | 1.5     | 6.8     | 5.3  | 0.12               | -1.3      | 0.25 | -5.2    | 1.1       | 0.49 | 2.2     |
|                                                                                | N_Pr.Ym       | 2.6     | 6.9     | 5.5  | 0.06               | -1.1      | 0.17 | -6.5    | 1.1       | 0.33 | 3.3     |
|                                                                                | Pr.Ym         | 1.5     | 6.9     | 5.5  | 0.09               | -1.8      | 0.22 | -8.2    | 3.6       | 0.44 | 8.2     |
| Non-diet-related self-protective response (NDSP)                               | Inexperienced | 2.5     | 6.5     | 5.5  | 0.05               | -0.8      | 0.16 | -5.0    | 0.6       | 0.32 | 1.9     |
|                                                                                | Experienced   | 1.8     | 6.5     | 5.2  | 0.11               | -0.8      | 0.25 | -3.2    | 0.3       | 0.49 | 0.6     |
|                                                                                | N_Pr.Ym       | 2.3     | 6.5     | 5.4  | 0.06               | -0.8      | 0.17 | -4.7    | 0.4       | 0.33 | 1.2     |
|                                                                                | Pr.Ym         | 1.8     | 6.5     | 5.5  | 0.08               | -1.1      | 0.22 | -5.0    | 2.1       | 0.44 | 4.8     |
| Diet-related self-protective response (DSP)                                    | Inexperienced | 1.0     | 5.0     | 2.7  | 0.07               | 0.1       | 0.16 | 0.6     | -0.6      | 0.32 | -1.9    |
|                                                                                | Experienced   | 1.0     | 5.0     | 3.0  | 0.11               | 0.0       | 0.25 | 0.0     | -0.6      | 0.49 | -1.2    |
|                                                                                | N_Pr.Ym       | 1.0     | 5.0     | 2.8  | 0.08               | 0.0       | 0.17 | 0.0     | -0.6      | 0.33 | -1.8    |
|                                                                                | Pr.Ym         | 1.0     | 5.0     | 2.7  | 0.11               | 0.2       | 0.22 | 0.9     | -0.6      | 0.44 | -1.4    |

Note: Inexperienced: lay public; Experienced: experienced public; Pr.Ym: pregnant women and young mothers; N\_Pr.Ym: the remaining population.
